# Supplementary material for: In quest of cathode materials for Ca ion batteries: the CaMO3 perovskites (M = Mo, Cr, Mn, Fe, Co, and Ni)
Source: Royal Society of Chemistry journal article supplement (doi:10.1039/c6cp03381d), 2016-01-01
Supplement: c6cp03381d1.pdf [file c6cp03381d1.pdf]

## Supplementary Information

TABLE I: Theoretical specific capacity (in mAh/g-CaMO<sub>3</sub>) of some of the investigated CaMO<sub>3</sub> perovskites assuming 100% calcium de-intercalation

| TM                                      | Mo  | Cr  | Mn  | Fe  | Co  | Ni  |
|-----------------------------------------|-----|-----|-----|-----|-----|-----|
| Theoretical specific capacities (mAh/g) | 291 | 383 | 375 | 372 | 364 | 365 |

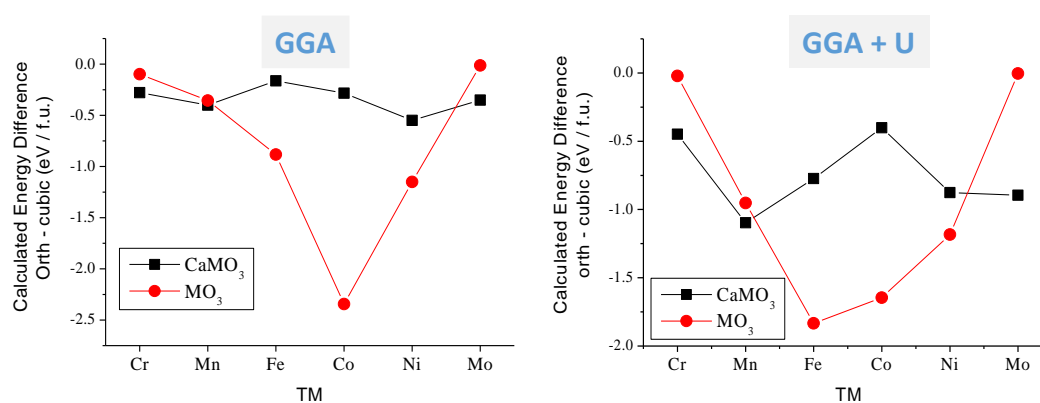

**Figure 1.-** Calculated energy difference between the cubic and the orthorhombic symmetry for CaMO<sub>3</sub> (black squares) and MO<sub>3</sub> (red circles) perovskites within the GGA approximation (left) and the GGA+U (right).

**TABLE II.** Calculated lattice parameters (in Å) for orthorhombic MO<sub>3</sub> structures (S.G. *Pnma*) within the GGA and the GGA+U method.

| TM | Approximant | <i>a</i> | <i>b</i> | <i>c</i> |
|----|-------------|----------|----------|----------|
| Mo | GGA         | 5.383    | 7.539    | 5.283    |
|    | GGA+U       | 5.388    | 7.547    | 5.289    |
| Cr | GGA         | 4.940    | 6.938    | 4.823    |
|    | GGA+U       | 4.493    | 6.943    | 4.825    |
| Mn | GGA         | 4.839    | 6.802    | 4.695    |
|    | GGA+U       | 4.831    | 6.909    | 4.766    |
| Fe | GGA         | 5.356    | 6.015    | 4.720    |
|    | GGA+U       | 5.625    | 6.211    | 5.165    |
| Co | GGA         | 4.578    | 6.878    | 4.604    |
|    | GGA+U       | 4.834    | 6.957    | 4.881    |
| Ni | GGA         | 4.753    | 6.732    | 4.704    |
|    | GGA+U       | 4.728    | 6.741    | 4.673    |

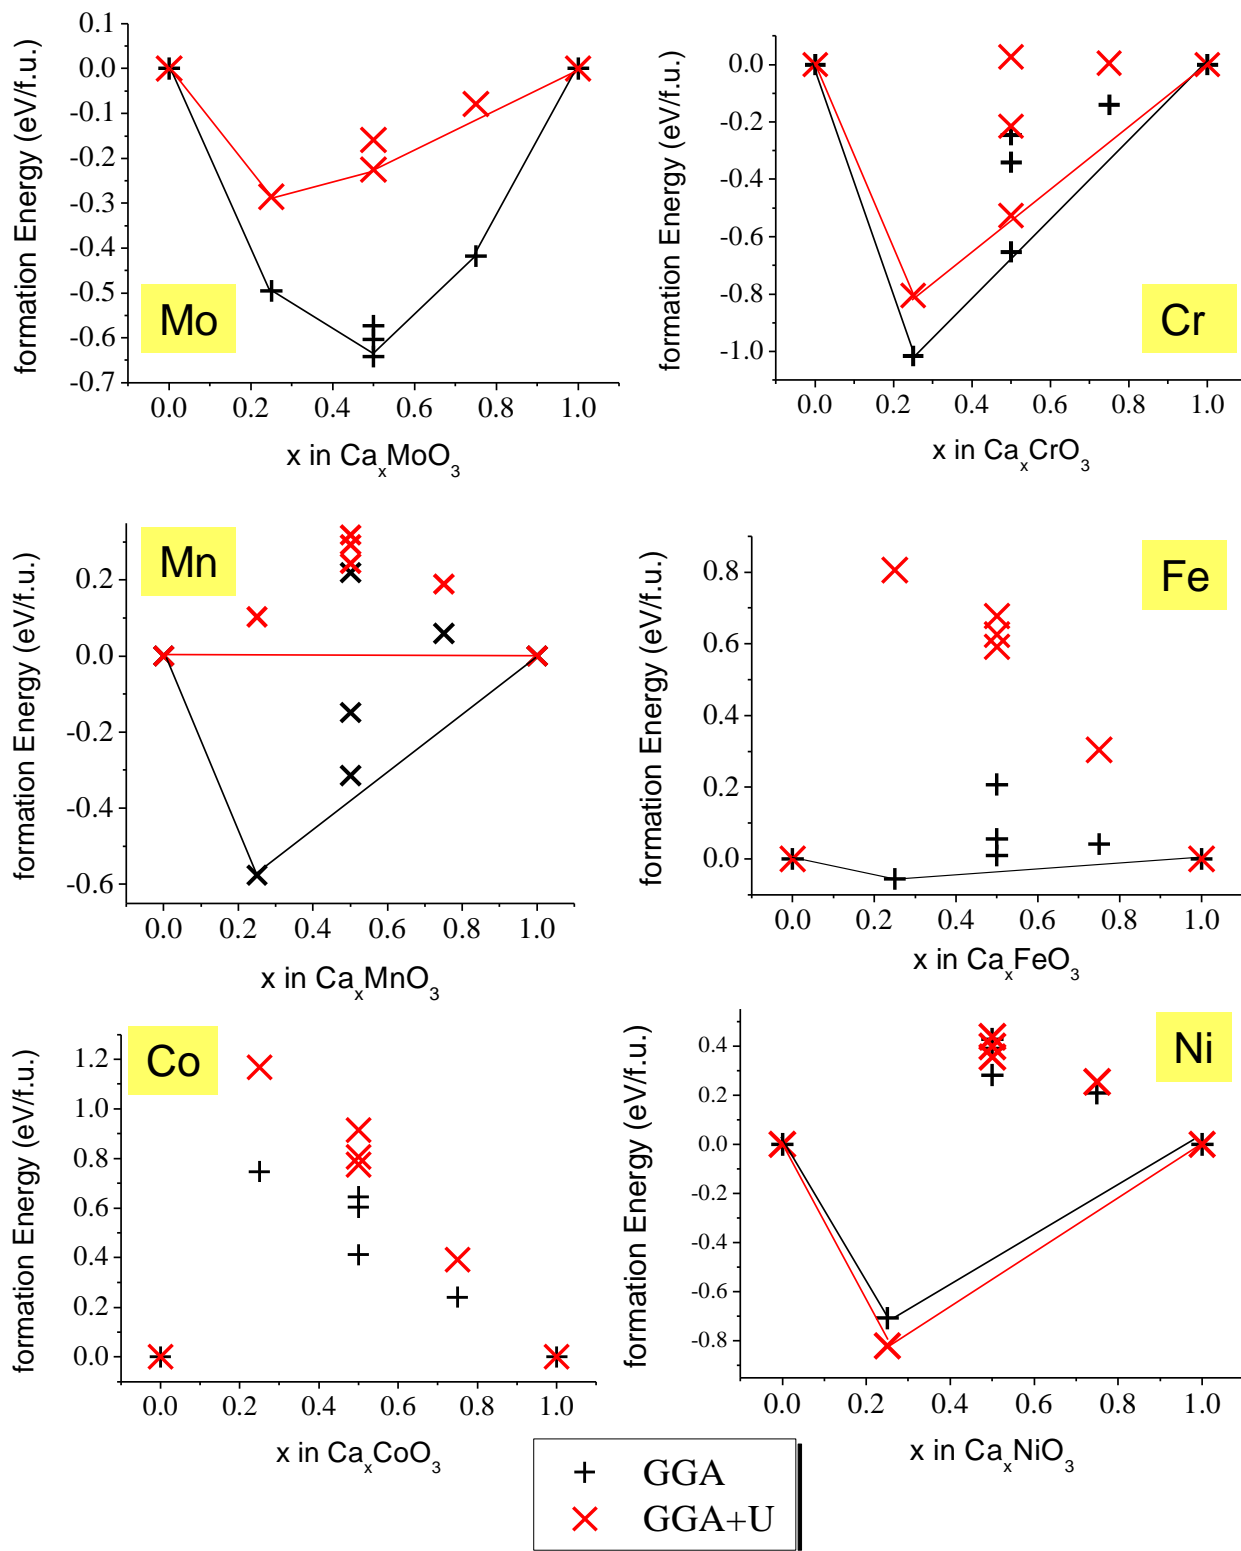

**Figure 2.-** Calculated formation energies of ordered  $\text{Ca}_x\text{MO}_3$  structures as a function of the calcium concentration. Red for GGA+U and black for GGA.
